# Supplementary material for: Rapid and reproducible generation of glioblastoma spheroids for high-throughput drug screening
Source: Frontiers journal article supplement (doi:10.3389/fbioe.2024.1471012), 2024-12-18
Supplement: Data_Sheet_4.pdf [file Data_Sheet_4.pdf]

**Supplemental Table 2. Ratio between Unstained cells and cells stained by PI in a spheroid**

Spheroids from 10 different GBM cell lines were grown for 2, 4 and 7 days starting either with 2500 or with 5000 cells (n=5 spheroids for each condition; each in a separate well). Cells received Propidium Iodide (PI; 0.1 µg/ml) the day, they were seeded. At the days indicated, the total size of the spheroids was determined after phase contrast microscopy and the volume of the inner core of cells stained by PI was determined after fluorescence microscopy. In some cases, it was not possible to determine the volume of the spheroid or the stained core, because the spheroids deviated too much from a sphere. In addition, in some cases the border between stained and unstained cells could not be identified with certainty (though we used different exposure times for fluorescence microscopy). Therefore, in some cases, it was not possible to calculate the ratio between the volumes of the inner core and the total size of the spheroid and “n” was not in any case 5 (the number of spheroids originally formed).

| Cell line | Initial amount of cells | Unstained Cells percent |             |             |
|-----------|-------------------------|-------------------------|-------------|-------------|
|           |                         | 48 hours                | 96 hours    | 168 hours   |
| U-251MG   | 2500                    | 5.87 ± 0.66             | 3.80 ± 0.25 | 3.98 ± 0.23 |
|           | 5000                    | 2.16 ± 0.12             | 1.69 ± 0.08 | 4.77 ± 0.34 |
| 1321N1    | 2500                    | 4.28 ± 0.40             | 2.10 ± 0.13 | 3.91 ± 0.28 |
|           | 5000                    | 1.45 ± 0.06             | 0.63 ± 0.03 | 1.24 ± 0.04 |
| LN405     | 2500                    | 3.78 ± 0.39             | 1.25 ± 0.09 | 1.74 ± 0.13 |
|           | 5000                    | 2.09 ± 0.11             | 0.46 ± 0.02 | 0.88 ± 0.04 |
| MZ18      | 2500                    | 2.21 ± 0.10             | 0.48 ± 0.01 | 1.68 ± 0.11 |
|           | 5000                    | 6.87 ± 0.99             | 1.81 ± 0.25 | 5.34 ± 1.02 |
| T98G      | 2500                    | 5.87 ± 0.59             | 1.33 ± 0.07 | 1.43 ± 0.05 |
|           | 5000                    | 5.20 ± 0.63             | 1.23 ± 0.10 | 2.77 ± 0.19 |
| MZ54      | 2500                    | 3.86 ± 0.33             | 1.97 ± 0.18 | 2.49 ± 0.17 |
|           | 5000                    | 1.95 ± 0.08             | 1.53 ± 0.08 | 2.22 ± 0.10 |
| U-343MG   | 2500                    | 3.67 ± 0.32             | 0.31 ± 0.01 | 1.22 ± 0.05 |
|           | 5000                    | 3.41 ± 0.46             | 1.11 ± 0.10 | 2.15 ± 0.14 |
| G55T2     | 2500                    |                         |             | 6.04 ± 0.42 |
|           | 5000                    |                         | 4.23 ± 0.20 | 7.70 ± 0.70 |
| LN229     | 2500                    |                         |             | 3.96 ± 0.22 |
|           | 5000                    |                         |             | 3.88 ± 0.22 |
